# Supplementary material for: Glucogallin Attenuates the LPS-Induced Signaling in Macrophages and Protects Mice against Sepsis
Source: MDPI journal article supplement (doi:10.3390/ijms231911254), 2022-09-24
Supplement: s1 [file s1]

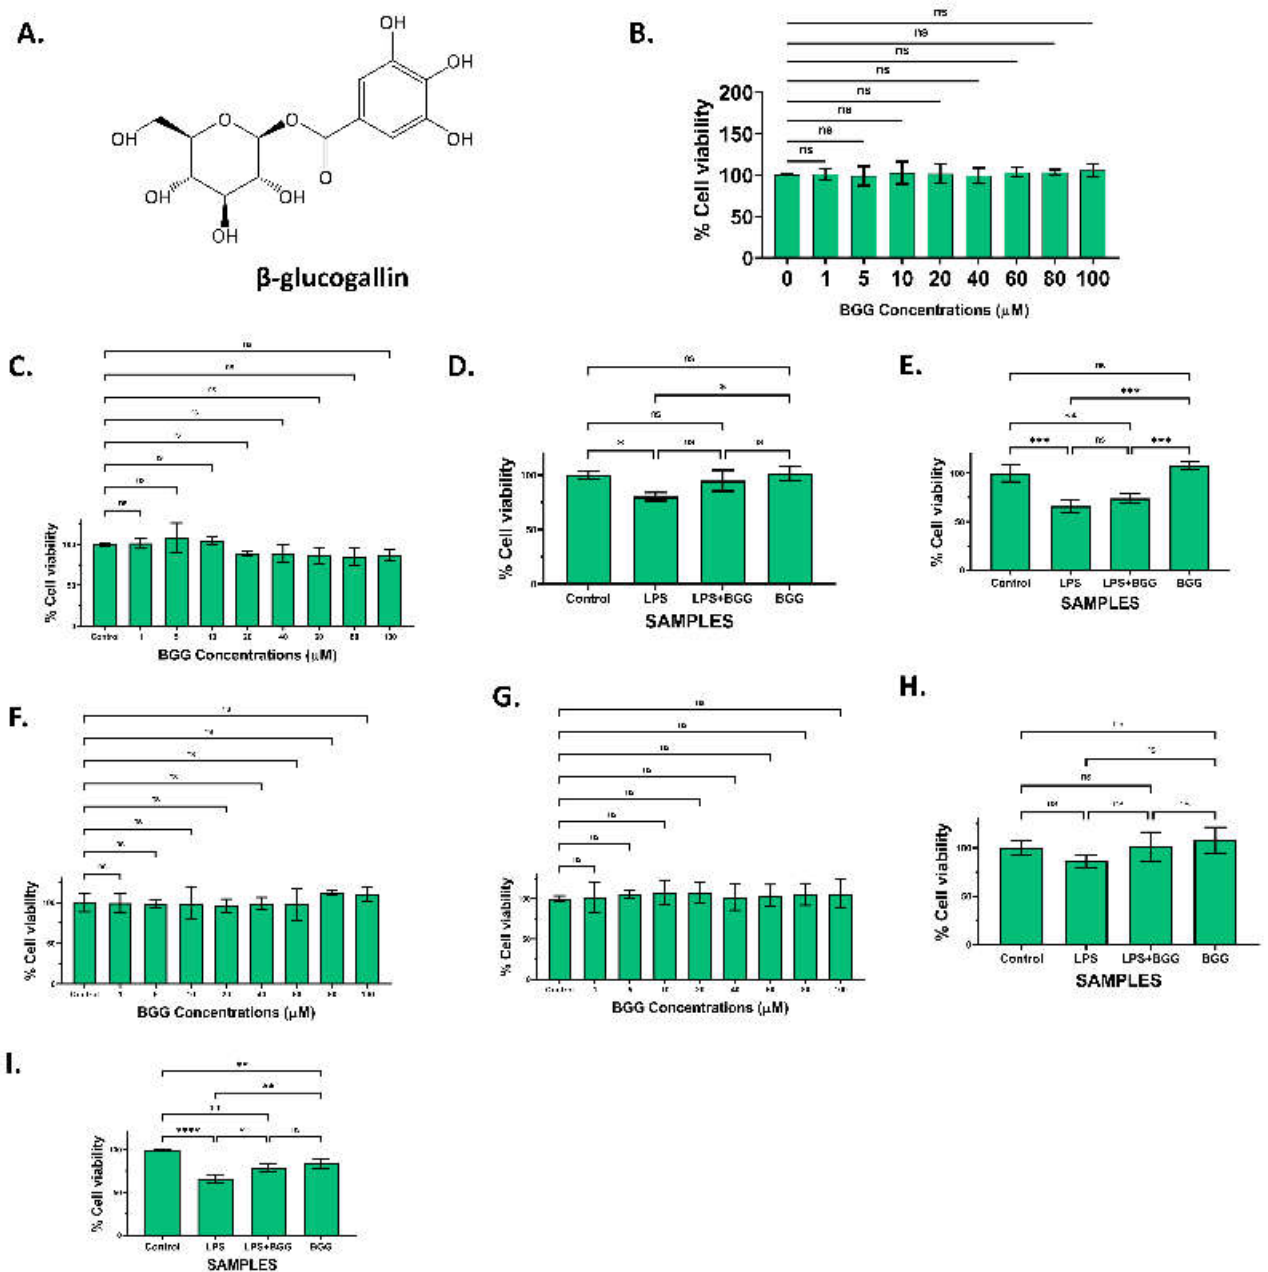

**Figure S1.** (A) Chemical Structure of BGG, Cell viability of various concentrations of BGG on RAW 264.7 and mice peritoneal macrophages measured with MTT, (B) 24 h and (C) 48 h on RAW 264.7 cells, (D) 24 h and (E) 48 h on mice peritoneal macrophages. Measurement of BGG (10  $\mu$ M) on LPS (1 $\mu$ g/mL) induced cell death (F) 24 h, (G) 48 h on RAW 264.7 cells, (H) 24 h and (I) 48 h on mice peritoneal macrophages. Results are mentioned as mean  $\pm$  SD (n = 5),  $p$ -value  $\leq 0.05$ . (\*  $p \leq 0.05$ , \*\*  $p < 0.01$ , \*\*\*  $p < 0.001$ , and \*\*\*\*  $p < 0.0001$ ).

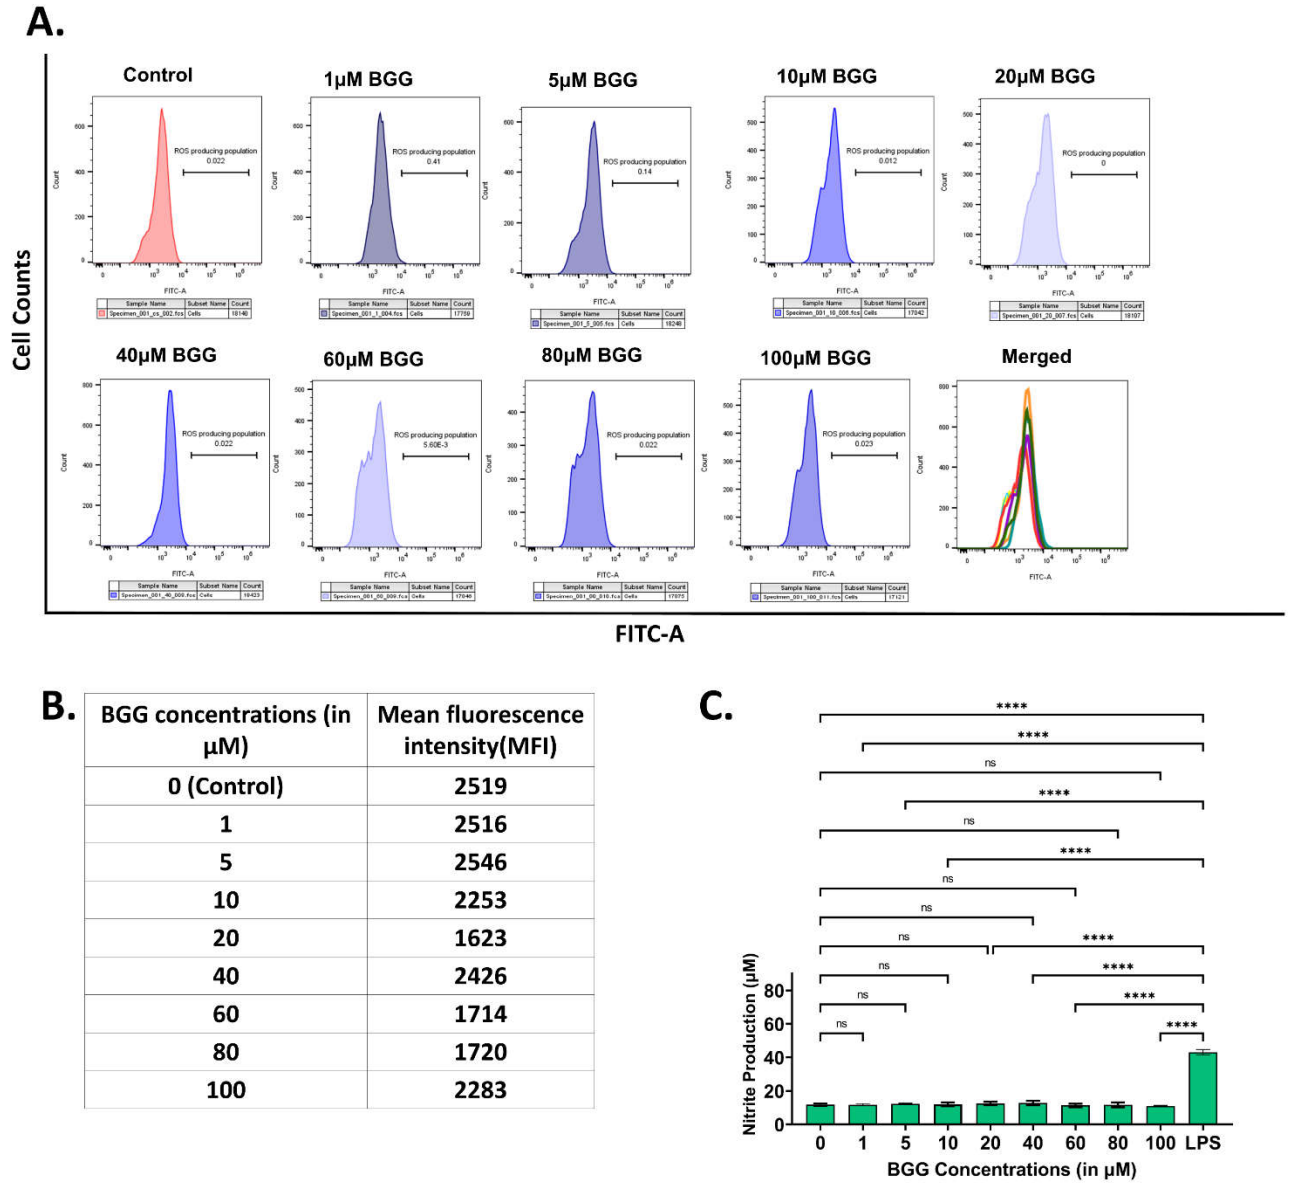

**Figure S2.** DCFDA-based total reactive oxygen species (ROS) production assay on the various concentration of BGG on RAW264.7 macrophages (B) and their respective mean fluorescence intensity (C) Extracellularly NO assay of different concentrations of BGG on RAW 264.7 macrophages. Results are mentioned as mean  $\pm$  SD, (\*  $p \leq 0.05$ , \*\*  $p < 0.001$ , \*\*\*  $p < 1e-04$ , and \*\*\*\*  $p < 1e-05$ ) ( $n = 3$  independent experiments).

**A. Change in intracellular IFN expression**

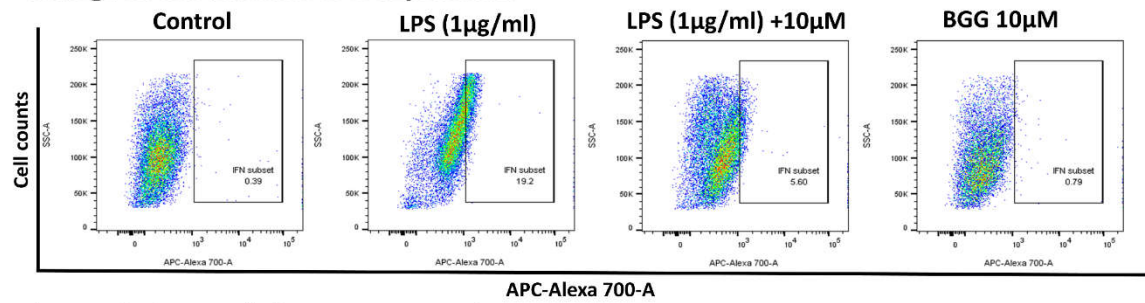

**B. Change in intracellular TNF expression**

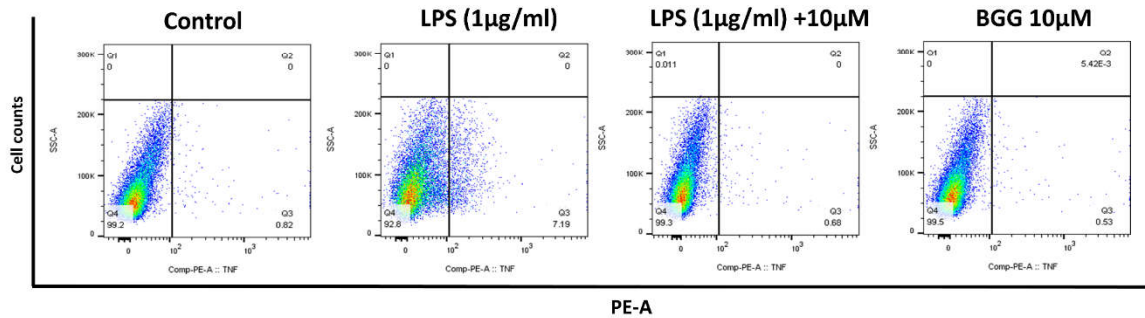

**C. Change in intracellular IL-10 expression**

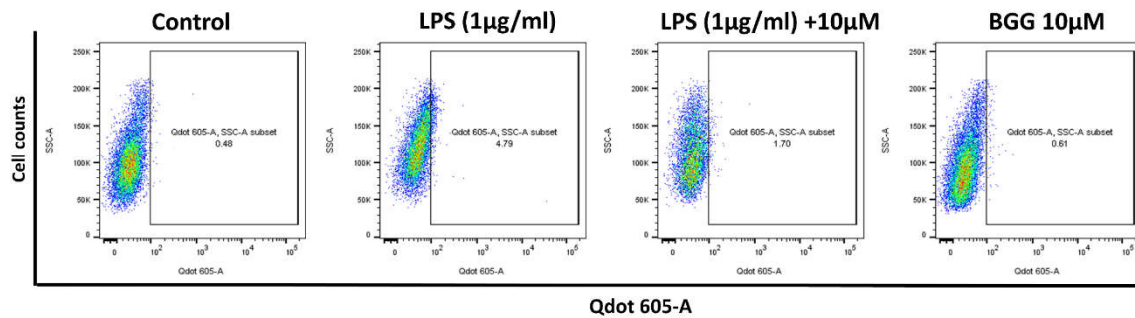

**D.**

|         | TNF (%age expression) | IFN (%age expression) | IL10 (%age expression) |
|---------|-----------------------|-----------------------|------------------------|
| Control | 0.82                  | 0.29                  | 0.40                   |
| LPS     | 7.19                  | 19.2                  | 4.79                   |
| LPS+BGG | 0.68                  | 5.60                  | 1.70                   |
| BGG     | 0.53                  | 0.79                  | 0.61                   |

**Figure S3.** Measuring Intracellular cytokine interleukins by Flow Cytometry (A) Change in expression of IFN (B) Change in expression of IL-10 (C) Change in expression of TNF and (D) Table represents the change in expression(%age) of interleukin in percentage.

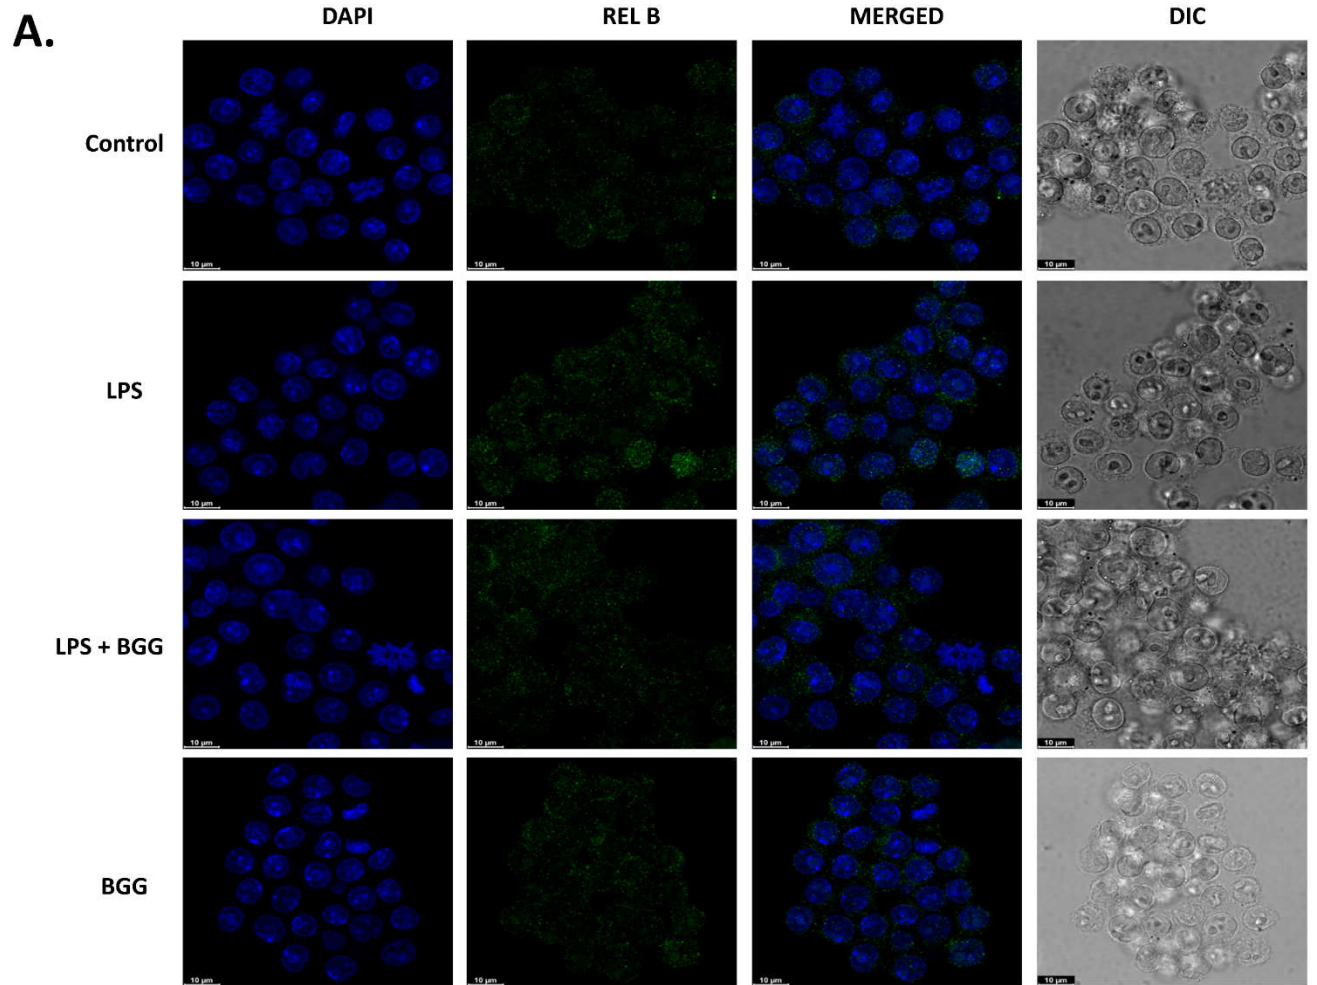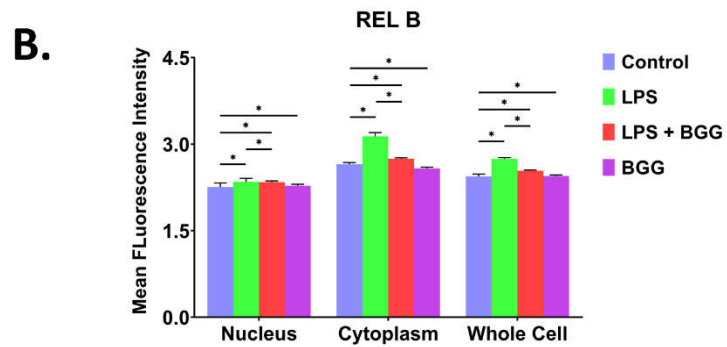

**Figure S4.** Immunofluorescence staining (A) To measure the translocation of RelB from the cytoplasm to the nucleus, and (B) Graph represents the mean fluorescence intensity of RelB in the nucleus, cytoplasm, and whole cells, (\*  $p \leq 0.05$ ).

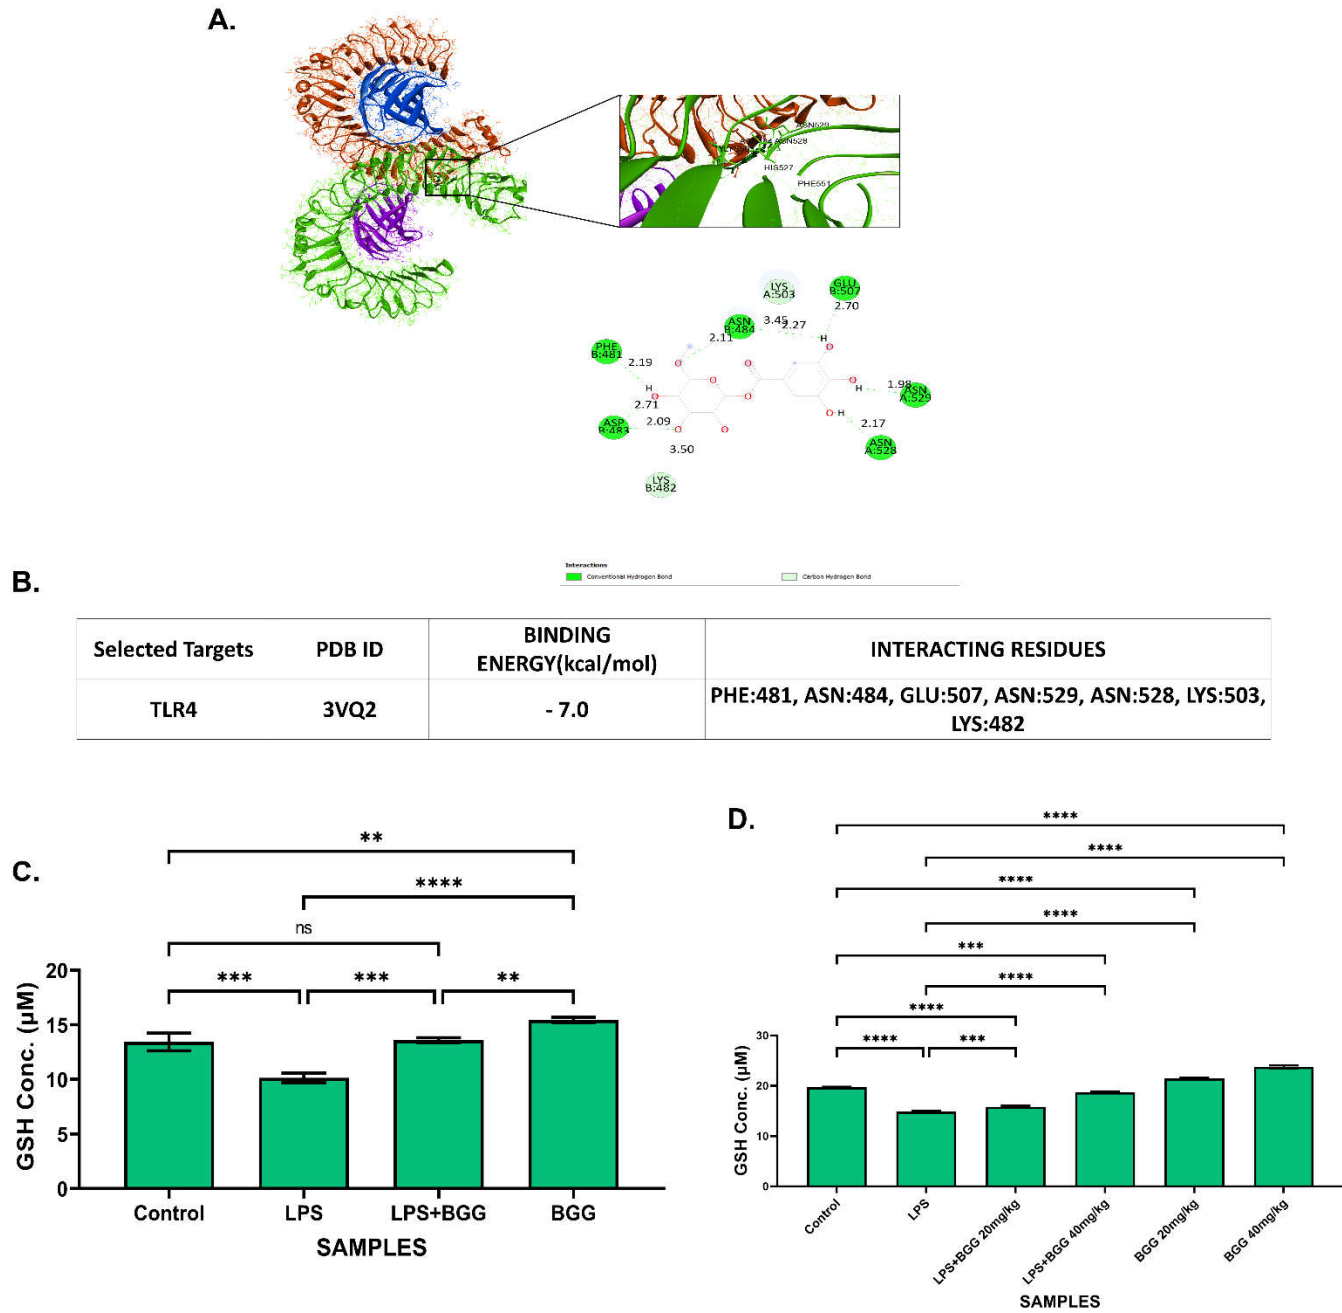

**Figure S5.** Molecular docking of BGG against (A) TLR4, (B) Table represents the PDB ID, binding energy, and interacting residues and (C) Represents the GSH assay with cell lysate, and (D) Represents the GSH assay with treated animal mice serum, (\*  $p \leq 0.05$ , \*\*  $p < 0.001$ , \*\*\*  $p < 1e-04$ , and \*\*\*\*  $p < 1e-05$ ).
